# Supplementary material
Source: MDPI journal article supplement (https://www.mdpi.com/2073-4395/14/2/323)
Supplement: s1 [file s1]

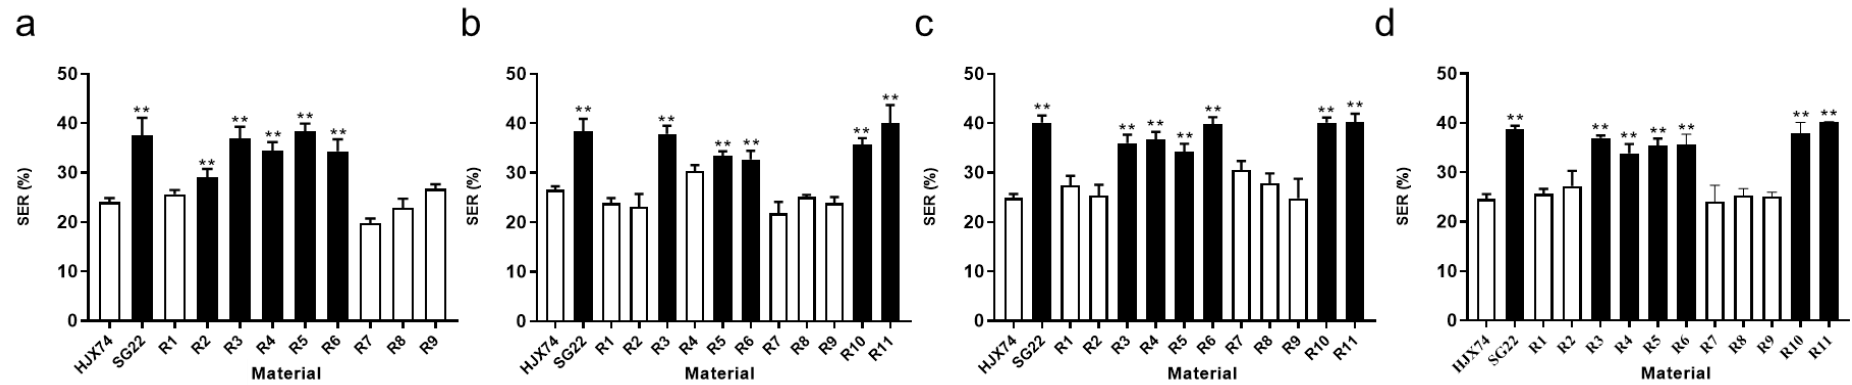

**Figure S1** SER distribution of the secondary SSSLs during three seasons. **(a)**, **(b)**, and **(c)**, the SER values in the fall cropping of 2019, the spring cropping of 2020, and the fall cropping of 2020, respectively. **(d)**, the mean SER across the three cropping seasons. **R1-R11**, the secondary SSSLs.
